# Supplementary material for: Relationship closeness buffers the effects of perceived stress on transcriptomic indicators of cellular stress and biological aging marker p16INK4a
Source: publisher site journal article supplement (doi:10.18632/aging.103739), 2020-07-26
Supplement: Supplementary file [file aging-v12i16-103739-supplementary-material-SD1.pdf]

## SUPPLEMENTARY TABLES

**Supplementary Table 1. Random intercept models with chronic stress exposure and relationship closeness predicting *CDKN2A* expression (*N* = 70).**

| Variables                               | Unadjusted model |           |          |                 | Adjusted model |           |          |                 |
|-----------------------------------------|------------------|-----------|----------|-----------------|----------------|-----------|----------|-----------------|
|                                         | <i>b</i>         | <i>SE</i> | <i>p</i> | 95% CI          | <i>b</i>       | <i>SE</i> | <i>p</i> | 95% CI          |
| Intercept                               | 6.808            | 0.005     | <.001    | [6.798, 6.819]  | 6.797          | 0.010     | <.001    | [6.777, 6.817]  |
| Chronic stress                          | 0.014            | 0.005     | .01      | [0.004, 0.025]  | 0.014          | 0.005     | .01      | [0.004, 0.025]  |
| Relationship closeness                  | 0.005            | 0.005     | .38      | [-0.006, 0.016] | 0.004          | 0.006     | .52      | [-0.008, 0.015] |
| Chronic stress × Relationship closeness | -0.003           | 0.004     | .46      | [-0.012, 0.006] | -0.001         | 0.005     | .84      | [-0.010, 0.008] |
| Age                                     |                  |           |          |                 | 0.005          | 0.005     | .31      | [-0.005, 0.016] |
| Sex                                     |                  |           |          |                 | 0.004          | 0.011     | .70      | [-0.018, 0.026] |
| Ethnicity/race                          |                  |           |          |                 | 0.004          | 0.003     | .27      | [-0.003, 0.010] |

Note. CI = confidence interval. All continuous variables were z-transformed.

**Supplementary Table 2. Random intercept models with accumulated daily stress and relationship closeness predicting *CDKN2A* expression (*N* = 70).**

| Variables                             | Unadjusted model |           |          |                 | Adjusted model |           |          |                 |
|---------------------------------------|------------------|-----------|----------|-----------------|----------------|-----------|----------|-----------------|
|                                       | <i>b</i>         | <i>SE</i> | <i>p</i> | 95% CI          | <i>b</i>       | <i>SE</i> | <i>p</i> | 95% CI          |
| Intercept                             | 6.808            | 0.005     | <.001    | [6.798, 6.819]  | 6.800          | 0.010     | <.001    | [6.780, 6.821]  |
| Daily stress                          | 0.013            | 0.005     | .02      | [0.002, 0.024]  | 0.012          | 0.006     | .04      | [0.001, 0.023]  |
| Relationship closeness                | 0.005            | 0.005     | .38      | [-0.006, 0.016] | 0.004          | 0.006     | .47      | [-0.007, 0.016] |
| Daily stress × Relationship closeness | -0.002           | 0.004     | .67      | [-0.011, 0.007] | -0.001         | 0.005     | .78      | [-0.011, 0.008] |
| Age                                   |                  |           |          |                 | 0.004          | 0.005     | .50      | [-0.007, 0.015] |
| Sex                                   |                  |           |          |                 | 0.004          | 0.011     | .70      | [-0.018, 0.026] |
| Ethnicity/race                        |                  |           |          |                 | 0.002          | 0.003     | .49      | [-0.004, 0.009] |

Note. CI = confidence interval. All continuous variables were z-transformed.

**Supplementary Table 3. List of differentially expressed genes (>1.2-fold) for the interaction of perceived stress and relationship closeness (low vs. high).**

| <b>Up-regulated genes</b> | <b>Down-regulated genes</b> |
|---------------------------|-----------------------------|
| LOC728937                 | HLA-A29.1                   |
| LOC100131971              | TUBB2A                      |
| CCL3L3                    | FCGR1B                      |
| LOC100129650              | LILRA3                      |
| TMEM158                   | FCGR1A                      |
| SERPINA13                 | FCGR1C                      |
| CFD                       | ORM1                        |
| HBG2                      | LOC100133875                |
| IFI27                     | PI3                         |
| ACCS                      | HS.137971                   |
| LOC728823                 | HLA-DQB1                    |
| LOC644191                 | GNG10                       |
| LOC641768                 | HS.508682                   |
| LOC645979                 | IL18RAP                     |
| LOC441377                 | SIGLEC14                    |
| LOC650646                 | SLPI                        |
| RPS26P11                  | ANXA3                       |
| LOC644934                 | CXCL10                      |
| MYOM2                     | C19ORF59                    |
| LOC644928                 | LOC731682                   |
| RPS26L                    | PROK2                       |
| RPS26                     | SCGB3A1                     |
| FOLR3                     | S100A12                     |
| HLA-DRB1                  | DEFA1                       |
| HLA-DRB5                  | TNFSF13B                    |
